# Supplementary material
Source: Springer Nature journal article supplement (https://www.springermedizin.de/resource/supplementary/12888_2012_1263_MOESM3_ESM.pdf/9480536)

# Social function

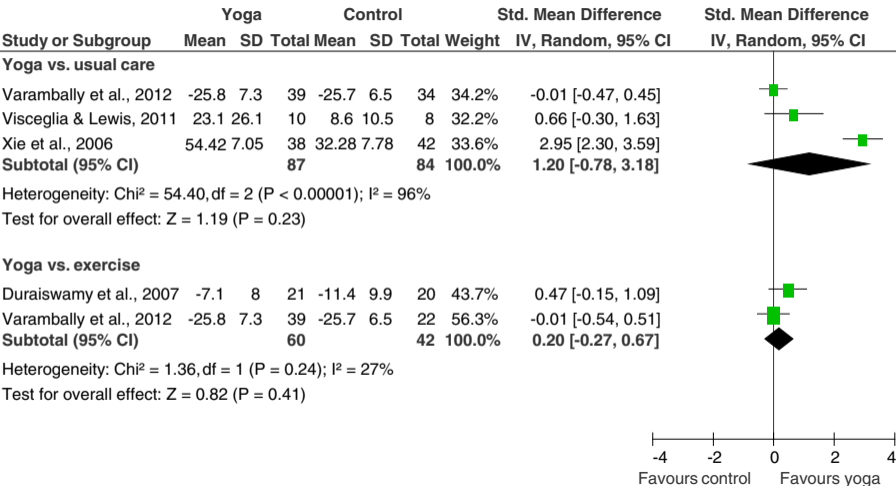

Test for subgroup differences: Chi<sup>2</sup> = 0.93, df = 1 (P = 0.33), I<sup>2</sup> = 0%

Supplement: MOESM3 [file 9480536]
